# Supplementary material for: Modified Atmosphere Packaging (MAP) for Seaweed Conservation: Impact on Physicochemical Characteristics and Microbiological Activity
Source: MDPI journal article supplement (doi:10.3390/foods12142736), 2023-07-18
Supplement: s1 [file s1]

## Supplementary Material

### Tables

|                                                                                                                                                                                                                                                                                        |   |
|----------------------------------------------------------------------------------------------------------------------------------------------------------------------------------------------------------------------------------------------------------------------------------------|---|
| Table S1. Color changes <sup>#</sup> and color simulation throughout storage days for <i>P. umbilicalis</i> and <i>U. lactuca</i> preserved by different treatments. ....                                                                                                              | 2 |
| Table S2. Microbial counts* for Coliforms, <i>E. coli</i> , Coagulase-positive Staphylococci, <i>Vibrio</i> spp., <i>Salmonella</i> spp., and <i>L. monocytogenes</i> at storage days 0 and 15 for <i>P. umbilicalis</i> and <i>U. lactuca</i> preserved by different treatments. .... | 3 |
| Table S3a. ANOVA results for the GC-TOF-MS analysis of <i>Porphyra umbilicalis</i> .....                                                                                                                                                                                               | 4 |
| Table S3b. ANOVA results for the GC-TOF-MS analysis of <i>Ulva lactuca</i> .....                                                                                                                                                                                                       | 4 |
| Table S3c. Tukey HSD for the GC-TOF-MS analysis of <i>P. umbilicalis</i> and <i>U. lactuca</i> . ....                                                                                                                                                                                  | 4 |
| Table S4. French guidelines that apply to dry seaweed products and Portuguese guidelines that apply to “minimally processed” food products [1,2]. ....                                                                                                                                 | 5 |

### Figures

|                                                                                                                                    |   |
|------------------------------------------------------------------------------------------------------------------------------------|---|
| Figure S1. Diversity of VOCs over time in <i>Porphyra umbilicalis</i> and <i>Ulva lactuca</i> , grouped by functional groups. .... | 6 |
| Figure S2. Heatmap graphic with the GC-TOF-MS results for <i>Porphyra umbilicalis</i> .....                                        | 7 |
| Figure S3. Heatmap graphic with the GC-TOF-MS results for <i>Ulva lactuca</i> .....                                                | 8 |

**Table S1.** Color changes<sup>#</sup> and color simulation throughout storage days for *P. umbilicalis* and *U. lactuca* preserved by different treatments.

The results are expressed as the CIELAB coordinates for  $L^*$ ,  $a^*$ ,  $b^*$ , and the calculated color deviation ( $\Delta E$ ).

| CIELAB Coordinates | Days   | <i>Porphyra umbilicalis</i> (PU)                                                    |                                           |                                          | <i>Ulva lactuca</i> (UL)                                                             |                                             |                                             |
|--------------------|--------|-------------------------------------------------------------------------------------|-------------------------------------------|------------------------------------------|--------------------------------------------------------------------------------------|---------------------------------------------|---------------------------------------------|
|                    |        | CTRL                                                                                | MAP                                       | VAC                                      | CTRL                                                                                 | MAP                                         | VAC                                         |
| $L^*$              | Day 0  | 32.18 <sup>a, A</sup><br>[30.60, 35.54]                                             | 32.18 <sup>a, A</sup><br>[30.60, 35.54]   | 32.18 <sup>a, A</sup><br>[30.60, 35.54]  | 73.59 <sup>a, A</sup><br>[71.99, 76.84]                                              | 73.59 <sup>a, A</sup><br>[71.99, 76.84]     | 73.59 <sup>ab, A</sup><br>[71.99, 76.84]    |
|                    | Day 3  | 36.84 <sup>a, A</sup><br>[34.73, 37.24]                                             | 35.24 <sup>ab, A</sup><br>[34.00, 37.1]   | 34.47 <sup>a, A</sup><br>[33.82, 35.65]  | 76.58 <sup>ab, A</sup><br>[76.38, 78.41]                                             | 77.56 <sup>ab, A</sup><br>[75.75, 77.97]    | 71.41 <sup>b, B</sup><br>[70.46, 74.79]     |
|                    | Day 6  | 33.79 <sup>a, A</sup><br>[33.07, 35.53]                                             | 37.38 <sup>b, A</sup><br>[34.8, 38.89]    | 36.38 <sup>ab, A</sup><br>[33.38, 39.16] | 78.80 <sup>bc, A</sup><br>[77.11, 80.39]                                             | 77.35 <sup>ab, A</sup><br>[75.68, 78.8]     | 78.08 <sup>ac, A</sup><br>[76.63, 80.15]    |
|                    | Day 9  | 36.55 <sup>a, A</sup><br>[34.93, 38.77]                                             | 34.38 <sup>ab, A</sup><br>[30.42, 35.95]  | 34.35 <sup>a, A</sup><br>[31.32, 39.21]  | 76.27 <sup>ab, AB</sup><br>[75.87, 77.82]                                            | 78.37 <sup>b, A</sup><br>[77.62, 79.23]     | 74.02 <sup>b, B</sup><br>[69.85, 76.86]     |
|                    | Day 12 | 36.73 <sup>a, A</sup><br>[35.29, 39.00]                                             | 37.42 <sup>b, A</sup><br>[35.45, 40.57]   | 41.00 <sup>b, A</sup><br>[39.41, 45.03]  | 77.02 <sup>ab, A</sup><br>[73.18, 78.52]                                             | 77.71 <sup>ab, A</sup><br>[75.82, 78.46]    | 78.48 <sup>c, A</sup><br>[77.16, 79.6]      |
|                    | Day 15 | 36.55 <sup>a, A</sup><br>[36.00, 37.28]                                             | 36.51 <sup>ab, A</sup><br>[34.38, 39.72]  | 42.61 <sup>b, A</sup><br>[39.55, 43.19]  | 81.41 <sup>c, A</sup><br>[79.88, 81.86]                                              | 77.03 <sup>ab, B</sup><br>[73.85, 77.74]    | 79.32 <sup>c, A</sup><br>[78.25, 80.68]     |
| $a^*$              | Day 0  | 6.72 <sup>a, A</sup><br>[6.19, 8.32]                                                | 6.72 <sup>a, A</sup><br>[6.19, 8.32]      | 6.72 <sup>ac, A</sup><br>[6.19, 8.32]    | -14.73 <sup>a, A</sup><br>[-16.50, -13.82]                                           | -14.73 <sup>a, A</sup><br>[-16.50, -13.82]  | -14.73 <sup>a, A</sup><br>[-16.50, -13.82]  |
|                    | Day 3  | 5.18 <sup>ab, A</sup><br>[4.20, 5.52]                                               | 3.73 <sup>b, A</sup><br>[2.84, 4.94]      | 4.59 <sup>b, A</sup><br>[3.97, 5.69]     | -13.87 <sup>ab, A</sup><br>[-14.95, -13.16]                                          | -12.70 <sup>b, A</sup><br>[-13.37, -11.93]  | -14.72 <sup>a, A</sup><br>[-16.02, -13.53]  |
|                    | Day 6  | 3.63 <sup>b, A</sup><br>[3.09, 4.28]                                                | 4.68 <sup>bc, A</sup><br>[2.65, 5.28]     | 4.06 <sup>b, A</sup><br>[3.34, 4.93]     | -14.04 <sup>ab, A</sup><br>[-14.76, -13.57]                                          | -11.49 <sup>bc, B</sup><br>[-12.14, -10.93] | -10.36 <sup>bc, B</sup><br>[-11.20, -10.18] |
|                    | Day 9  | 5.17 <sup>ab, A</sup><br>[4.54, 6.34]                                               | 6.35 <sup>ac, A</sup><br>[5.31, 7.68]     | 5.41 <sup>ab, A</sup><br>[4.30, 6.69]    | -13.02 <sup>ab, A</sup><br>[-14.03, -12.37]                                          | -10.08 <sup>c, B</sup><br>[-10.79, -9.44]   | -10.73 <sup>b, B</sup><br>[-12.04, -10.46]  |
|                    | Day 12 | 3.58 <sup>b, A</sup><br>[3.22, 4.39]                                                | 9.19 <sup>a, B</sup><br>[7.67, 10.70]     | 8.36 <sup>c, B</sup><br>[7.55, 13.20]    | -12.93 <sup>b, A</sup><br>[-13.72, -12.67]                                           | -10.74 <sup>c, B</sup><br>[-11.93, -9.84]   | -10.64 <sup>bc, B</sup><br>[-11.31, -9.97]  |
|                    | Day 15 | 4.18 <sup>b, A</sup><br>[3.66, 5.28]                                                | 7.27 <sup>a, B</sup><br>[5.72, 9.87]      | 13.25 <sup>c, B</sup><br>[10.17, 15.35]  | -10.58 <sup>c, A</sup><br>[-11.31, -9.50]                                            | -9.17 <sup>c, A</sup><br>[-10.88, -8.78]    | -8.43 <sup>c, A</sup><br>[-9.16, -7.96]     |
| $b^*$              | Day 0  | 27.74 <sup>a, A</sup><br>[26.85, 28.41]                                             | 27.74 <sup>a, A</sup><br>[26.85, 28.41]   | 27.74 <sup>a, A</sup><br>[26.85, 28.41]  | 44.61 <sup>a, A</sup><br>[43.59, 47.05]                                              | 44.61 <sup>a, A</sup><br>[43.59, 47.05]     | 44.61 <sup>ab, A</sup><br>[43.59, 47.05]    |
|                    | Day 3  | 24.07 <sup>a, A</sup><br>[22.81, 27.04]                                             | 23.55 <sup>abc, A</sup><br>[22.22, 25.99] | 24.01 <sup>ab, A</sup><br>[22.84, 26.63] | 45.76 <sup>a, A</sup><br>[39.3, 47.83]                                               | 48.97 <sup>a, AB</sup><br>[40.98, 50.71]    | 55.44 <sup>b, B</sup><br>[51.08, 56.86]     |
|                    | Day 6  | 24.67 <sup>a, A</sup><br>[23.60, 26.08]                                             | 26.56 <sup>ab, A</sup><br>[24.93, 27.30]  | 25.31 <sup>ab, A</sup><br>[24.10, 26.34] | 35.42 <sup>ab, A</sup><br>[32.46, 43.8]                                              | 42.32 <sup>ab, A</sup><br>[40.53, 47.29]    | 37.44 <sup>ac, A</sup><br>[32.94, 47.00]    |
|                    | Day 9  | 26.97 <sup>a, A</sup><br>[24.64, 28.4]                                              | 24.66 <sup>bc, AB</sup><br>[23.48, 25.26] | 22.59 <sup>bc, B</sup><br>[21.93, 23.18] | 41.15 <sup>a, A</sup><br>[32.36, 45.64]                                              | 35.71 <sup>b, A</sup><br>[32.34, 41.59]     | 49.49 <sup>b, B</sup><br>[47.40, 53.18]     |
|                    | Day 12 | 26.49 <sup>a, A</sup><br>[25.80, 28.26]                                             | 22.33 <sup>c, B</sup><br>[20.49, 23.88]   | 19.62 <sup>bc, B</sup><br>[2.67, 24.84]  | 41.80 <sup>a, A</sup><br>[38.60, 44.68]                                              | 35.90 <sup>ab, A</sup><br>[34.96, 49.28]    | 37.06 <sup>ac, A</sup><br>[35.10, 40.44]    |
|                    | Day 15 | 27.13 <sup>a, A</sup><br>[25.33, 29.44]                                             | 19.31 <sup>bc, B</sup><br>[11.19, 25.17]  | 1.68 <sup>c, B</sup><br>[0.86, 8.39]     | 27.38 <sup>b, A</sup><br>[25.94, 28.57]                                              | 46.76 <sup>a, B</sup><br>[41.66, 49.3]      | 34.83 <sup>c, A</sup><br>[32.75, 36.76]     |
| $\Delta E$         | Day 0  | –                                                                                   | –                                         | –                                        | –                                                                                    | –                                           | –                                           |
|                    | Day 3  | 6.19 <sup>a, A</sup><br>[5.12, 8.19]                                                | 7.21 <sup>a, A</sup><br>[5.06, 8.48]      | 5.24 <sup>a, A</sup><br>[3.45, 6.86]     | 4.65 <sup>a, A</sup><br>[3.62, 7.36]                                                 | 6.64 <sup>a, A</sup><br>[6.05, 7.27]        | 10.62 <sup>a, A</sup><br>[8.69, 12.6]       |
|                    | Day 6  | 5.35 <sup>a, A</sup><br>[3.80, 6.07]                                                | 6.49 <sup>a, A</sup><br>[4.87, 8.25]      | 5.79 <sup>ab, A</sup><br>[4.58, 8.13]    | 10.89 <sup>a, A</sup><br>[4.92, 14.56]                                               | 6.59 <sup>a, A</sup><br>[5.45, 7.72]        | 11.4 <sup>a, A</sup><br>[7.62, 14.41]       |
|                    | Day 9  | 4.97 <sup>a, A</sup><br>[2.87, 7.26]                                                | 4.69 <sup>a, A</sup><br>[4.03, 6.34]      | 6.85 <sup>ab, A</sup><br>[5.80, 8.85]    | 6.12 <sup>a, A</sup><br>[4.20, 13.58]                                                | 11.34 <sup>a, A</sup><br>[7.73, 15.38]      | 7.80 <sup>a, A</sup><br>[6.05, 10.08]       |
|                    | Day 12 | 5.16 <sup>a, A</sup><br>[4.92, 7.13]                                                | 7.56 <sup>a, A</sup><br>[5.76, 11.48]     | 10.86 <sup>bc, A</sup><br>[6.90, 29.03]  | 5.91 <sup>a, A</sup><br>[4.14, 9.86]                                                 | 11.40 <sup>a, A</sup><br>[7.98, 12.86]      | 10.33 <sup>a, A</sup><br>[8.11, 12.14]      |
|                    | Day 15 | 5.48 <sup>a, A</sup><br>[4.92, 6.08]                                                | 9.26 <sup>a, A</sup><br>[4.00, 17.69]     | 28.77 <sup>c, B</sup><br>[20.66, 29.95]  | 19.66 <sup>b, A</sup><br>[18.05, 21.53]                                              | 8.14 <sup>a, B</sup><br>[7.78, 9.35]        | 13.11 <sup>a, AB</sup><br>[12.06, 15.51]    |
| Color Simulation   | Day 0  |  |                                           |                                          |  |                                             |                                             |
|                    | Day 3  |  |                                           |                                          |  |                                             |                                             |
|                    | Day 6  |  |                                           |                                          |  |                                             |                                             |
|                    | Day 9  |  |                                           |                                          |  |                                             |                                             |
|                    | Day 12 |  |                                           |                                          |  |                                             |                                             |
|                    | Day 15 |  |                                           |                                          |  |                                             |                                             |

<sup>#</sup> **Notes:** Medians and interquartile range (IQR) [Q1, Q3] from duodecuple determinations on each experiment. Medians in the same column followed by a different lowercase letter are significantly different ( $P < 0.05$ ) throughout storage days. Medians in the same row followed by a different uppercase letter are significantly different ( $P < 0.05$ ) among treatments.

**Table S2.** Microbial counts\* for Coliforms, *E. coli*, Coagulase-positive Staphylococci, *Vibrio* spp., *Salmonella* spp., and *L. monocytogenes* at storage days 0 and 15 for *P. umbilicalis* and *U. lactuca* preserved by different treatments.

The results are expressed as the logarithm of colony-forming unit per gram of sample (log CFU.g<sup>-1</sup>).

| Microbiological Analysis                      | <i>Porphyra umbilicalis</i> (PU) |                |               |               | <i>Ulva lactuca</i> (UL) |                |               |               |
|-----------------------------------------------|----------------------------------|----------------|---------------|---------------|--------------------------|----------------|---------------|---------------|
|                                               | Day 0<br>CTRL                    | Day 15<br>CTRL | Day 15<br>MAP | Day 15<br>VAC | Day 0<br>CTRL            | Day 15<br>CTRL | Day 15<br>MAP | Day 15<br>VAC |
| Coliforms                                     | < LOD                            | < LOD          | < LOD         | < LOD         | < LOD                    | < LOD          | < LOD         | < LOD         |
| <i>Escherichia coli</i>                       | < LOD                            | < LOD          | < LOD         | < LOD         | < LOD                    | < LOD          | < LOD         | < LOD         |
| Coagulase-positive Staphylococci <sup>#</sup> | 2.7637                           | 2.6505         | < LOD         | < LOD         | < LOD                    | < LOD          | < LOD         | < LOD         |
| <i>Vibrio</i> spp.                            | < LOD                            | < LOD          | < LOD         | < LOD         | < LOD                    | < LOD          | < LOD         | < LOD         |
| <i>Salmonella</i> spp.                        | N/D                              | N/D            | N/D           | N/D           | N/D                      | N/D            | N/D           | N/D           |
| <i>Listeria monocytogenes</i>                 | N/D                              | N/D            | N/D           | N/D           | N/D                      | N/D            | N/D           | N/D           |

\* Notes: LOD = Limit of Detection; N/D = Not Detected; *Day 0* (n = 2 petri dishes x 2 dilutions x 4 repetitions = 16); *Day 15* (n = 2 petri dishes x 2 dilutions x 1 repetition = 4, for each treatment); LOD < 1 log CFU.g<sup>-1</sup> for coliforms and *Escherichia coli*, and LOD < 2 log CFU.g<sup>-1</sup> for Coagulase-positive Staphylococci and *Vibrio* spp.

<sup>#</sup> Observation: Black colonies without halo, non-characteristic of coagulase-positive Staphylococci.

### Analysis of Variance of Aligned Rank Transformed Data

Table Type: ANOVA Table (Type III tests)

Model: No Repeated Measures (LM)

Response: art(Values)

Equation: Values ~ Days + Treatments + Days:Treatments

**Table S3a.** ANOVA results for the GC-TOF-MS analysis of *Porphyra umbilicalis*

|   | Variables       | Df | Df.res | F value | Pr(>F)   | Signif. |
|---|-----------------|----|--------|---------|----------|---------|
| 1 | Days            | 5  | 2250   | 1.87202 | 0.096001 | .       |
| 2 | Treatments      | 2  | 2250   | 0.39675 | 0.672550 |         |
| 3 | Days:Treatments | 10 | 2250   | 0.28115 | 0.985454 |         |

Notes: Signif. codes: 0 '\*\*\*' 0.001 '\*\*' 0.01 '\*' 0.05 '.' 0.1 ' ' 1

**Table S3b.** ANOVA results for the GC-TOF-MS analysis of *Ulva lactuca*

|   | Variables       | Df | Df.res | F value | Pr(>F)     | Signif. |
|---|-----------------|----|--------|---------|------------|---------|
| 1 | Days            | 5  | 2646   | 18.9221 | < 2.22e-16 | ***     |
| 2 | Treatments      | 2  | 2646   | 14.4729 | 5.6058e-07 | ***     |
| 3 | Days:Treatments | 10 | 2646   | 7.3507  | 1.3834e-11 | ***     |

Notes: Signif. codes: 0 '\*\*\*' 0.001 '\*\*' 0.01 '\*' 0.05 '.' 0.1 ' ' 1

**Table S3c.** Tukey HSD for the GC-TOF-MS analysis of *P. umbilicalis* and *U. lactuca*.

| VOCs   | <i>Porphyra umbilicalis</i> (PU) |       |       | <i>Ulva lactuca</i> (UL) |      |      |
|--------|----------------------------------|-------|-------|--------------------------|------|------|
|        | CTRL                             | MAP   | VAC   | CTRL                     | MAP  | VAC  |
| Day 0  | a, A                             | a, A  | a, A  | a, A                     | a, A | a, A |
| Day 3  | ab, A                            | ab, A | ab, A | a, A                     | b, B | b, B |
| Day 6  | b, A                             | b, A  | b, A  | a, A                     | b, B | b, B |
| Day 9  | ab, A                            | ab, A | ab, A | a, A                     | b, B | b, B |
| Day 12 | ab, A                            | ab, A | ab, A | a, A                     | b, B | b, B |
| Day 15 | ab, A                            | ab, A | ab, A | a, A                     | b, B | b, B |

\* Notes: Different lowercase letters in the same column are significantly different ( $P < 0.05$ ) throughout storage days. Different uppercase letters in the same row are significantly different ( $P < 0.05$ ) among treatments (for each seaweed).

**Table S4.** French guidelines that apply to dry seaweed products and Portuguese guidelines that apply to “minimally processed” food products [1,2].

| Microorganisms / Pathogens                                                                                                                                              | French Guidelines Limits (CFU.g <sup>-1</sup> ) | Portuguese Guidelines Limits (CFU.g <sup>-1</sup> ) |
|-------------------------------------------------------------------------------------------------------------------------------------------------------------------------|-------------------------------------------------|-----------------------------------------------------|
| Aerobe mesophiles (30 °C)                                                                                                                                               | ≤ 10 <sup>5</sup>                               | ≤ 10 <sup>6</sup>                                   |
| Yeasts                                                                                                                                                                  | *****                                           | ≤ 10 <sup>5</sup>                                   |
| Molds                                                                                                                                                                   | *****                                           | ≤ 5x10 <sup>2</sup>                                 |
| Enterobacteriaceae (37 °C)                                                                                                                                              | *****                                           | ≤ 10 <sup>5</sup>                                   |
| Coliforms (fecal) / <i>E. coli</i>                                                                                                                                      | ≤ 10                                            | ≤ 10 (N/D)                                          |
| Anaerobe Sulfite Reducers                                                                                                                                               | ≤ 10 <sup>2</sup>                               | *****                                               |
| Coagulase-positive Staphylococci / <i>S. aureus</i>                                                                                                                     | ≤ 10 <sup>2</sup>                               | ≤ 10 (N/D)                                          |
| <i>Bacillus</i> spp.                                                                                                                                                    | *****                                           | ≤ 10 <sup>4</sup>                                   |
| <i>Bacillus cereus</i>                                                                                                                                                  | *****                                           | ≤ 10 <sup>3</sup>                                   |
| <i>Clostridium perfringens</i>                                                                                                                                          | ≤ 1                                             | ≤ 10 <sup>2</sup>                                   |
| <i>Listeria</i> spp.                                                                                                                                                    | *****                                           | ≤ 10 (N/D)                                          |
| <i>Listeria monocytogenes</i>                                                                                                                                           | *****                                           | Not detected (per 25 g)                             |
| <i>Salmonella</i> spp.                                                                                                                                                  | Not detected (per 25 g)                         | Not detected (per 25 g)                             |
| <i>Vibrio cholerae</i> ,<br><i>V. parahaemolyticus</i> ,<br><i>Campylobacter</i> spp.,<br><i>Cronobacter</i> spp., <i>Shigella</i> spp., <i>Yersinia enterocolitica</i> | *****                                           | Not detected (per 25 g)                             |

1. CEVA *Macroalgues et Microalgues Alimentaires - Statut Règlementaire En France et En Europe* (Synthèse CEVA 2019); Pleubian, France, 2019;
2. INSA *Interpretação de Resultados de Ensaaios Microbiológicos Em Alimentos Prontos Para Consumo e Em Superfícies Do Ambiente de Preparação e Distribuição Alimentar (Valores-Guia)*; Instituto Nacional de Saúde Doutor Ricardo Jorge: Lisboa, Portugal, 2019;

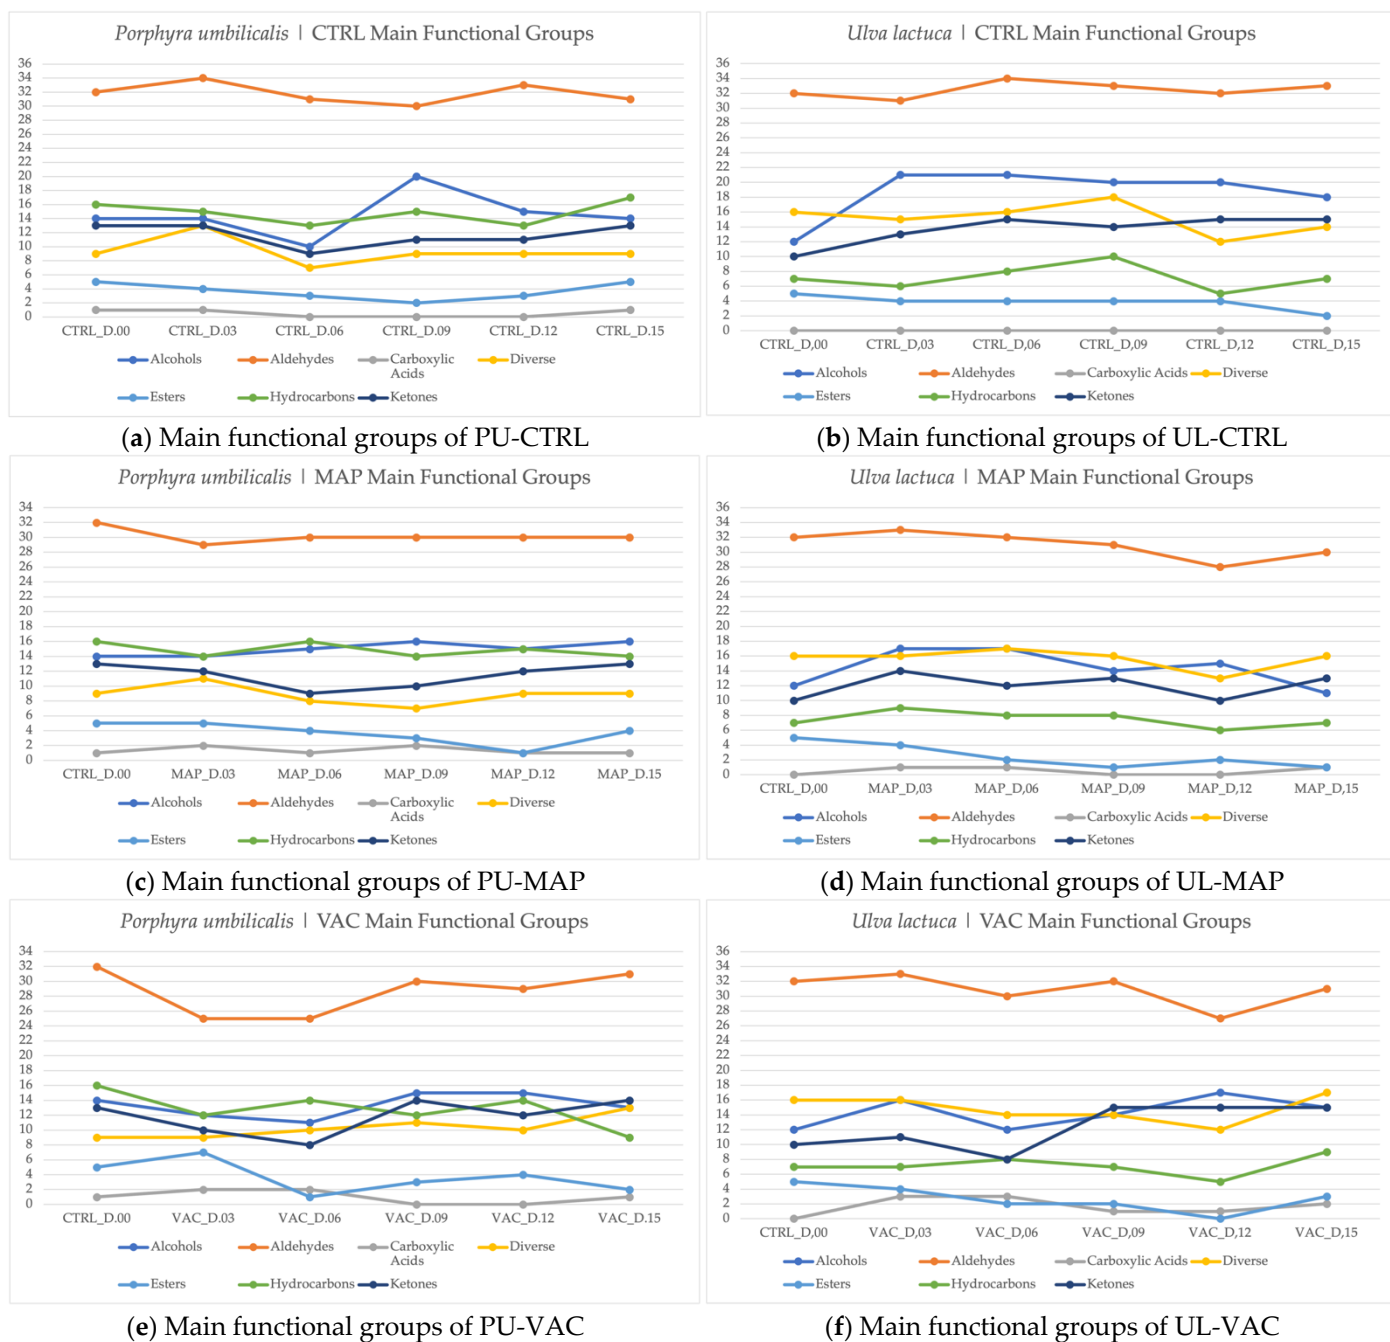

**Figure S1.** Diversity of VOCs over time in *Porphyrta umbilicalis* and *Ulva lactuca*, grouped by functional groups.

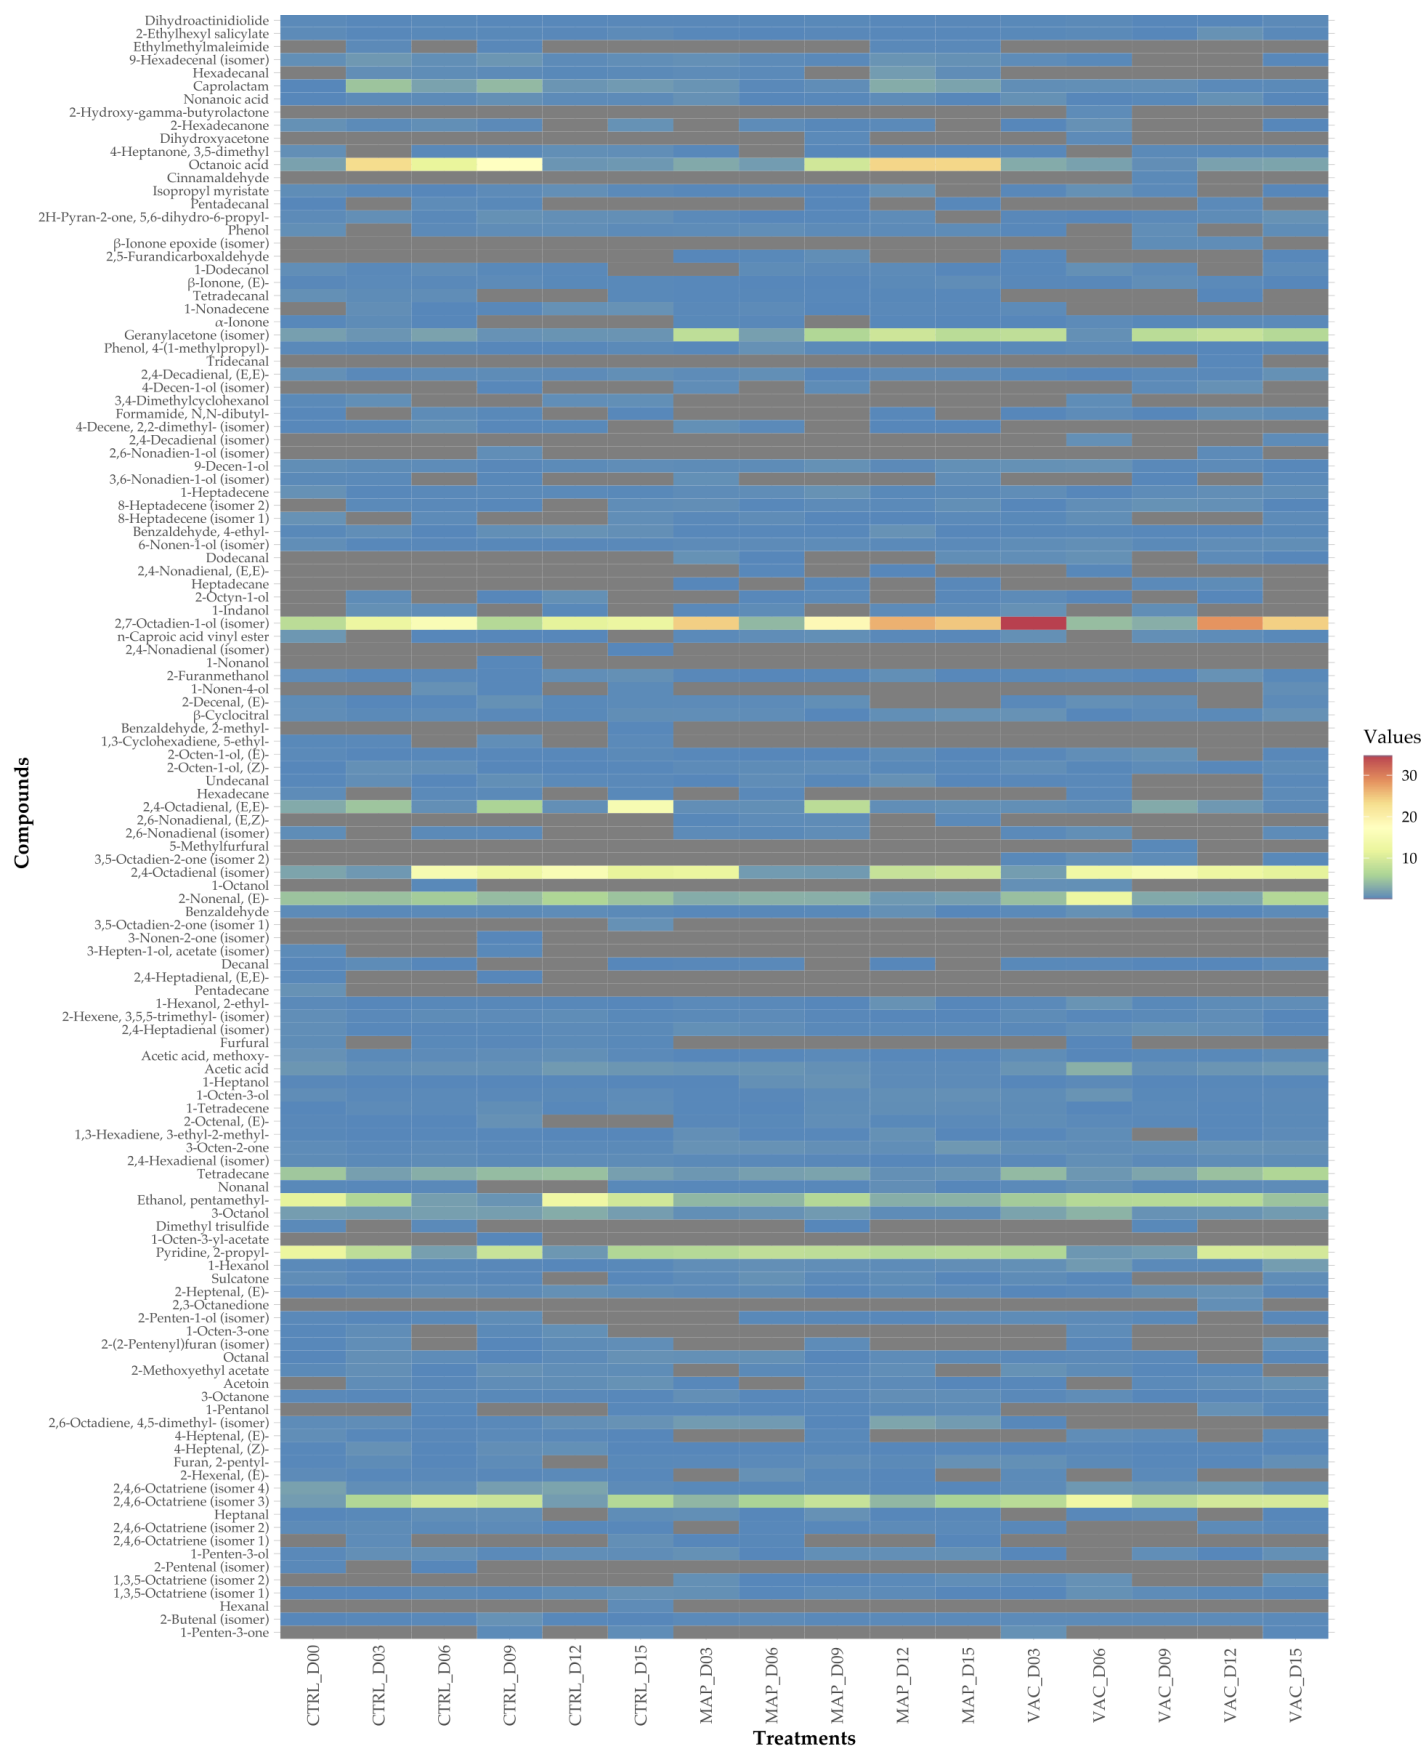

**Figure S2.** Heatmap graphic with the GC-TOF-MS results for *Porphyrta umbilicalis*

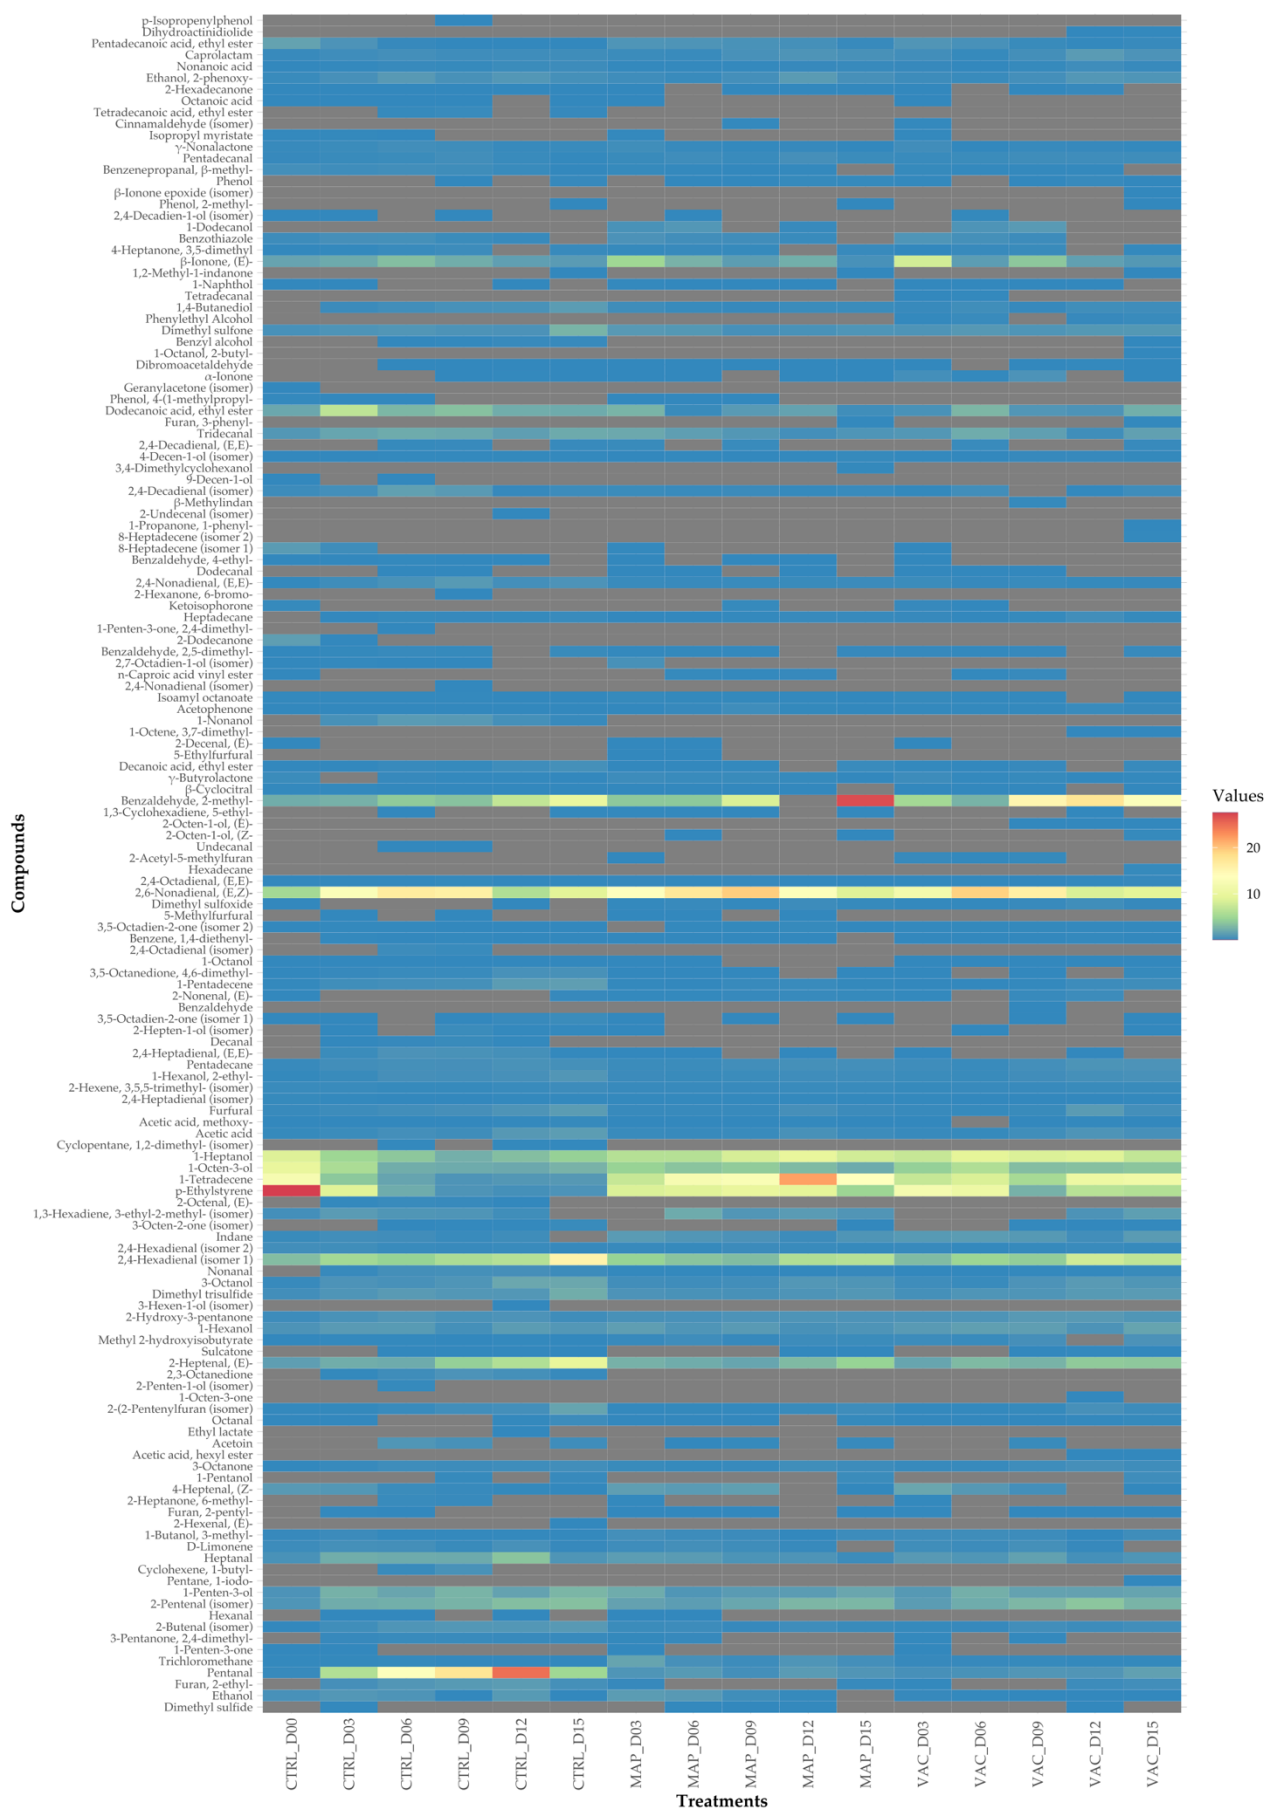

**Figure S3.** Heatmap graphic with the GC-TOF-MS results for *Ulva lactuca*
